# Supplementary material
Source: ML conference proceedings conference paper supplement (https://openreview.net/forum?id=Iq2IAWozNr)

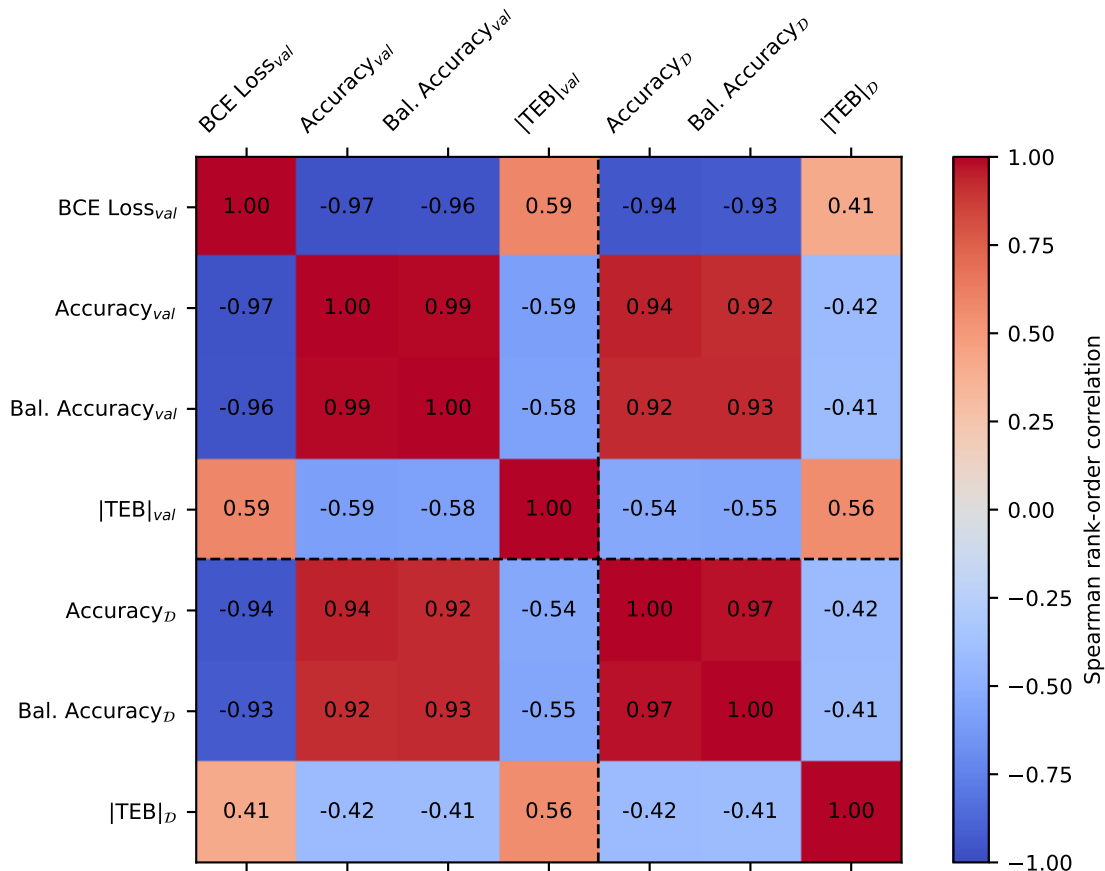

Supplement: supplementary_material [file attachment]

Many annotations

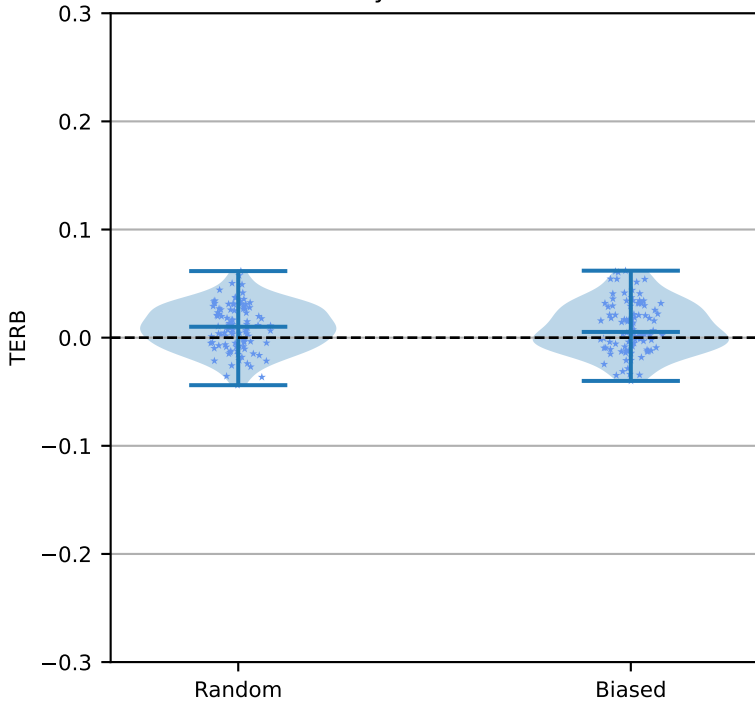

Few annotations

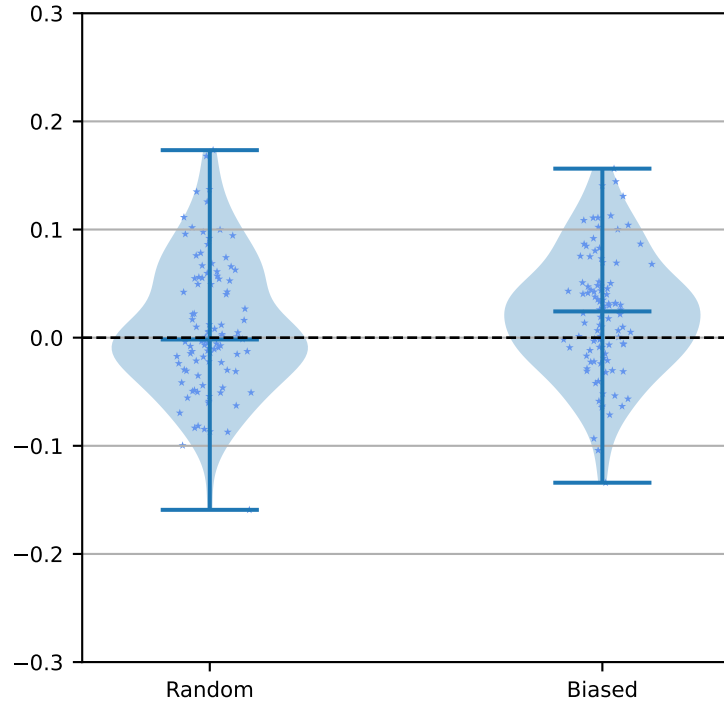

Supplement: supplementary_material [file attachment]

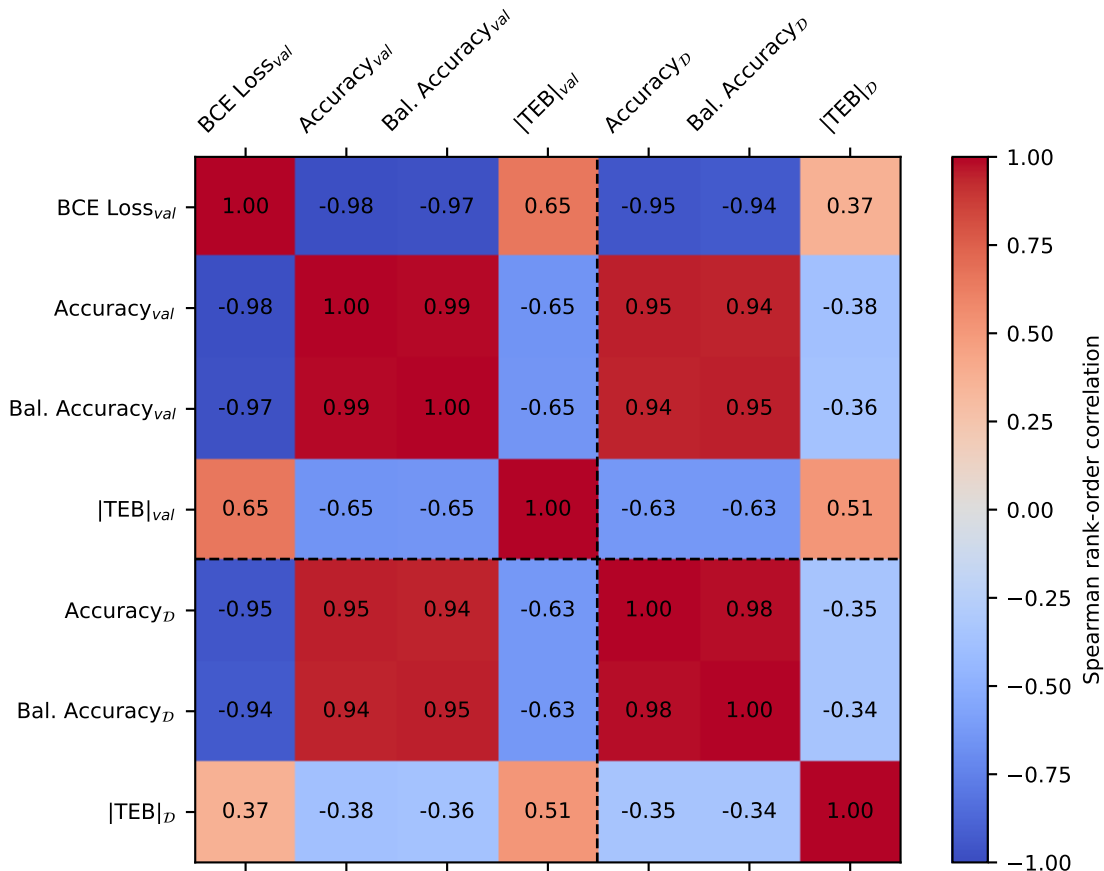

Supplement: supplementary_material [file attachment]

Random

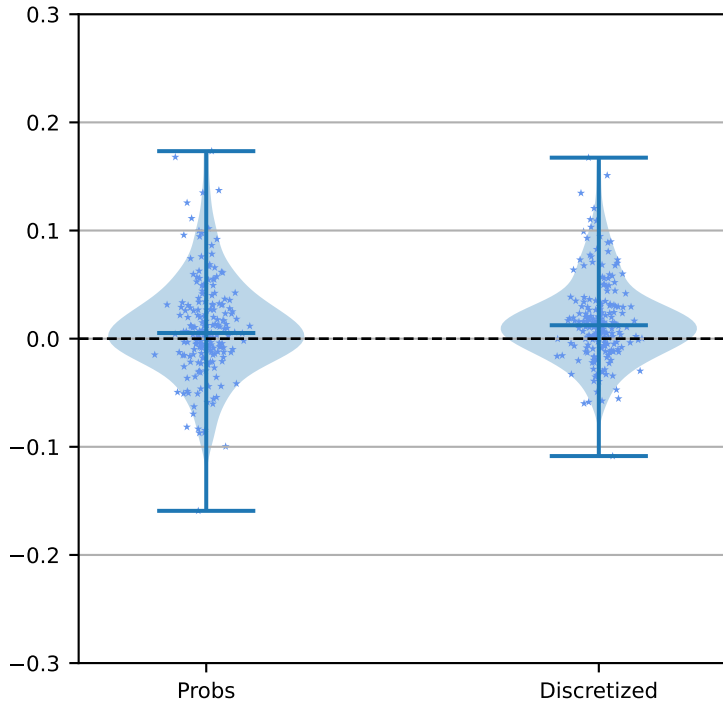

Biased

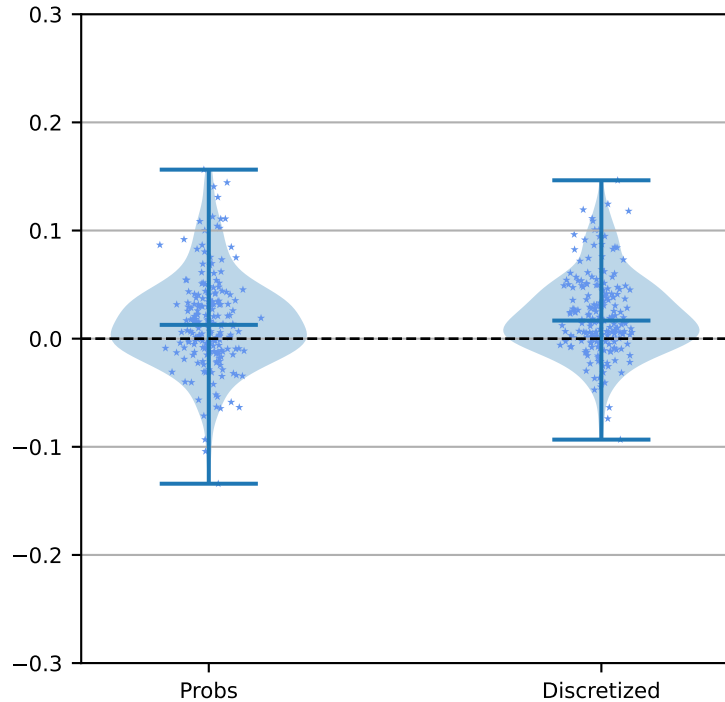

Supplement: supplementary_material [file attachment]
